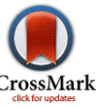

## Correction

# Correction: Correction: Microsporidia Detection and Genotyping Study of Human Pathogenic *E. bienersi* in Animals from Spain

## The PLOS ONE Staff

There is an error in affiliation 7 for author Javier Millán. Affiliation 7 should be: Faculty of Ecology and Natural Resources, Universidad Andres Bello, Santiago, Chile. The publisher apologizes for the error.

## Reference

1. Galván-Díaz AL, Magnet A, Fenoy S, Henriques-Gil N, Haro M, et al. (2014) Microsporidia Detection and Genotyping Study of Human Pathogenic *E. bienersi* in Animals from Spain. PLoS ONE 9(3): e92289. doi:10.1371/journal.pone.0092289
2. The PLOS ONE Staff (2014) Correction: Microsporidia Detection and Genotyping Study of Human Pathogenic *E. bienersi* in Animals from Spain. PLoS ONE 9(8): e106017. doi:10.1371/journal.pone.0106017

**Citation:** The PLOS ONE Staff (2014) Correction: Correction: Microsporidia Detection and Genotyping Study of Human Pathogenic *E. bienersi* in Animals from Spain. PLoS ONE 9(9): e108086. doi:10.1371/journal.pone.0108086

**Published:** September 8, 2014

**Copyright:** © 2014 The PLOS ONE Staff. This is an open-access article distributed under the terms of the Creative Commons Attribution License, which permits unrestricted use, distribution, and reproduction in any medium, provided the original author and source are credited.
